# Supplementary material
Source: PubMed Central journal article supplement (PMC7086033)
Supplement: supp_AC119.010808_155453_2_supp_475964_q5t11m.pdf [file supp_AC119.010808_155453_2_supp_475964_q5t11m.pdf]

## **Supporting Information**

### **Modulation of conformational equilibrium by phosphorylation underlies the activation of deubiquitinase A**

**Ashish Kabra, Efsita Rumpa, and Ying Li\***

Department of Chemistry, University of Louisville, 2320 South Brook Street, Louisville, KY 40208

\*To whom correspondence should be addressed: E-mail: [ying.li.1@louisville.edu](mailto:ying.li.1@louisville.edu)

## Supporting Methods

### CLEANEX experiment

The water exchange rates of backbone amide protons were measured using the phase-modulated CLEAN chemical exchange (CLEANEX-PM) pulse sequence (1). The experiments were performed at 299.6 K on a [<sup>2</sup>H, <sup>15</sup>N]-labeled p-DUBA sample at 420 μM in a buffer containing 50 mM sodium phosphate, pH 7.02, 100 mM NaCl and 2 mM TCEP. A series of 2D spectra with transfer periods of 5, 10, 15, 20, 25, 30, 40 and 50 ms and a reference spectrum were acquired. The spin-locking field during the CLEANEX period was 6.3 kHz. Each 2D spectrum was acquired with 1024 (<sup>1</sup>H) × 180 (<sup>15</sup>N) complex points and an interscan delay of 2 s. With 36 scans per FID, the total measurement time was approximately 62 h for the complete set. The reference spectrum was acquired with 8 scans. The exchange rate constant (*k*) was derived from fitting data to the equation below or a linear model when the build-up curves are in the initial rate regime:

$$\frac{I}{I_0} = \frac{k}{(R_{1A,app} + k - R_{1B,app})} \times \{exp(-R_{1B,app}\tau_m) - exp[-(R_{1A,app} + k)\tau_m]\}$$

where *k* is the rate constant;  $\tau_m$  is the mixing time;  $R_{1A,app}$  is the apparent relaxation rate of the amide <sup>1</sup>H during the mixing period.  $R_{1B,app}$  is the apparent solvent relaxation rate that was measured by a separate experiment using the same pulse sequence without water suppression, from which the water decay rate during the CLEANEX period was calculated. The value of  $R_{1B,app}$  was determined to be 0.6 s<sup>-1</sup> and the degree of water saturation was determined to be 79% according to the previously described methods (1). The exchange rates for amide protons were corrected by dividing the *k* by 0.79 due to this effect.

### <sup>15</sup>N transverse relaxation experiment

<sup>15</sup>N transverse relaxation rates ( $R_2$ ) were measured on [<sup>2</sup>H, <sup>15</sup>N]-labeled wild-type p-DUBA at 500 μM and np-DUBA at 575 μM and 297.6 K in the NMR buffer. The experiments were performed using a modified version of a TROSY-detected pulse sequence (2). The water magnetization was dephased at the beginning of the <sup>15</sup>N relaxation period. The data were acquired using 16 scans for each FID and a recycle delay of 1.5 s in an interleaved fashion. <sup>1</sup>H and <sup>15</sup>N 90° pulse widths were 10.4 μs and 29.3 μs, respectively, at full power levels. During the  $R_2$  relaxation period, the <sup>15</sup>N  $\pi$  pulses were applied every 1.25 ms at the full power level.  $R_2$  values were determined using relaxation delays of 10, 30, 50 and 70 ms. 1024 (<sup>1</sup>H) × 260 (<sup>15</sup>N) complex points were recorded for each spectrum with the spectral widths of 11574 Hz in  $t_2$  (<sup>1</sup>H) dimension and 2695 Hz in  $t_1$  (<sup>15</sup>N) dimension, respectively.

The <sup>15</sup>N transverse relaxation rates were determined by fitting the data to the equation:

$$I(t) = I_0 e^{-R_2 t}$$

where  $I_0$  is the cross-peak intensity at the zero relaxation delay and  $I(t)$  is the intensity at time  $t$ .

### pH titration experiments

The experiments were carried out on samples of <sup>15</sup>N-labeled p-DUBA using buffers containing 50 mM HEPES, 100 mM NaCl and 2 mM TCEP. 1 mM imidazole and 1 mM Tris were added to the samples as internal pH indicators (3). The samples were dialyzed against the buffers at the desired pH values. The sample concentrations were 460-750 μM. Phosphorus 1D experiments were performed at 299.6 K on a Varian Inova-500 MHz spectrometer equipped with a room temperature BBI probe. 17600 scans were recorded for each spectrum with an interscan delay of 2 s. WALTZ16 <sup>1</sup>H decoupling centered at 4.3 ppm was applied during the acquisition period. The spectra were indirectly referenced with DSS using the ratio 0.404807210 (4).

<sup>1</sup>H-<sup>15</sup>N TROSY experiments were performed on the same set of samples at 299.6 K. Each TROSY spectrum was acquired with 1024 (<sup>1</sup>H) × 260 (<sup>15</sup>N) complex points and 8 scans per FID. <sup>31</sup>P and <sup>1</sup>H chemical shifts of pS177 at various pH values were fit to the equation (5):

$$\delta_{obs} = (\delta_{deprot} - \delta D) + \frac{\delta D}{1 + 10^{(pK_a - pH)}}$$

where  $\delta_{obs}$  is the observed chemical shift in ppm,  $\delta_{deprot}$  is the chemical shift of the deprotonated species, and  $\delta D$  is the chemical shift difference between the protonated and deprotonated species.  $\delta D$  was set to 3.9 ppm for  $^{31}\text{P}$  and 0.64 ppm for  $^1\text{H}$  (6) to fit the titration curves.

#### **$^{15}\text{N}$ -NOESY-HSQC experiment**

3D  $^{15}\text{N}$ -NOESY-HSQC experiment was performed on  $^{15}\text{N}$ -labeled p-DUBA at 500  $\mu\text{M}$  in the NMR buffer at 300 K. The data were acquired with a mixing time of 100 ms, 140 complex points in the  $t_1$  period ( $^1\text{H}$ ), 48 complex points in the  $t_2$  period ( $^{15}\text{N}$ ), and 1024 complex points in the  $t_3$  ( $^1\text{H}$ ) period. 4 scans were recorded for each FID with an interscan delay of 1 s, which results in a total acquisition time of 36 hr.

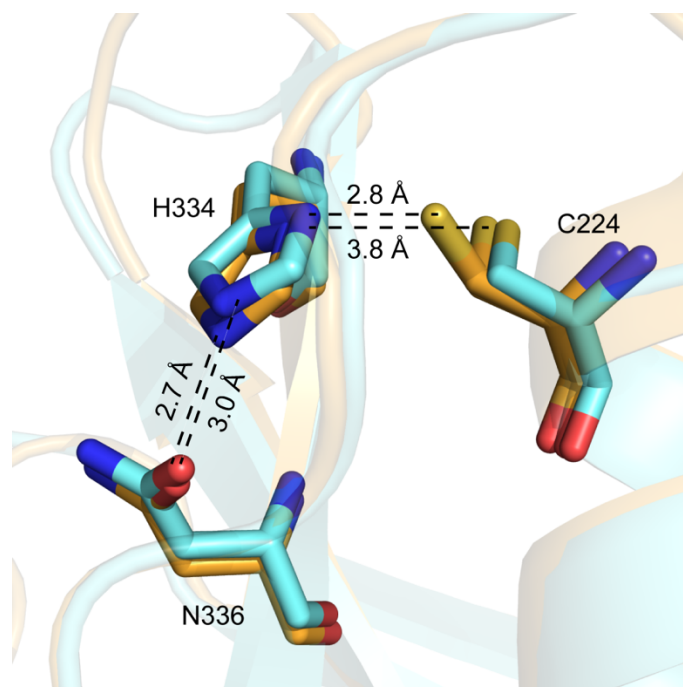

**Figure S1.** The comparison of the active sites in the crystal structures of the p-DUBA in the free form (carbon atoms in orange, PDB ID: 3PFY) and the p-DUBA covalently attached to ubiquitin-aldehyde (carbon atoms in cyan, PDB ID: 3TMP). In the free form, the catalytic cysteine displays two conformers with equal occupancy.

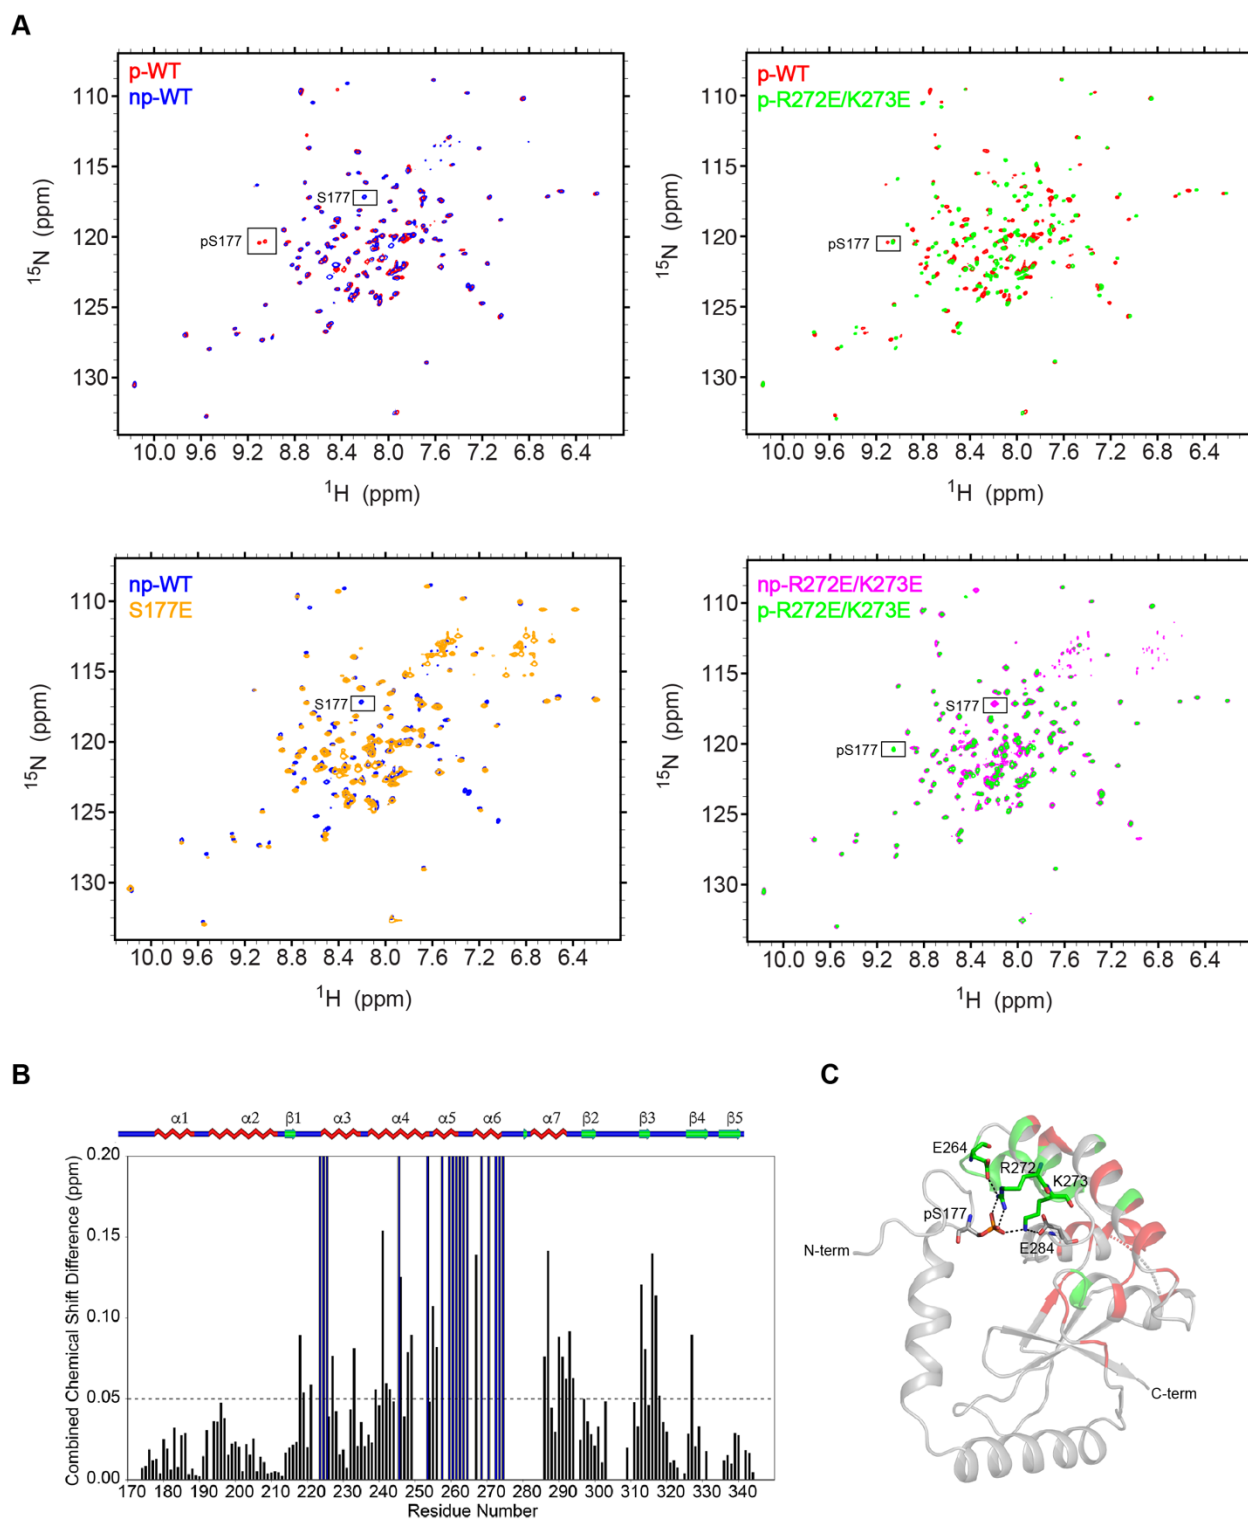

**Figure S2.** *A*,  $^{15}\text{N}$  TROSY spectra of wild-type DUBA in phosphorylated (p-WT) and nonphosphorylated (np-WT) forms, R272E/K273E mutant in phosphorylated (p-R272E/K273E) and nonphosphorylated (np-R272E/K273E) forms, and S177E mutants of DUBA. The S177E mutant was  $^{15}\text{N}$ -labeled and all the other forms of DUBA are  $[^2\text{H}, ^{15}\text{N}]$ -labeled. The data were acquired at 700 MHz  $^1\text{H}$  frequency and 300 K. *B*, the combined chemical shift difference between the p-WT and the p-R272E/K273E mutant was calculated

using the equation  $\Delta\delta_{diff} = \sqrt{(\Delta\delta_{HN}^2 + \frac{\Delta\delta_N^2}{25})}/2$  (7). The threshold for significant differences was set at  $\langle\Delta\delta_{diff}\rangle + 1\sigma$  (0.051 ppm) and indicated by the dashed line. Residues only detectable in the p-R272E/K273E mutant but not in the wild-type are represented by blue bars.  $\Delta\delta_{diff}$  for these residues was set to an arbitrary value of 0.20 ppm. C, crystal structure of p-DUBA (PDB ID: 3TMP) with the residues showing combined chemical shift differences higher than the threshold highlighted in red and residues only detectable in the p-R272E/K273E mutant highlighted in green. The salt-bridge interactions of R272 and K273 with pS177 and other negatively charged residues nearby are highlighted with the stick representation.

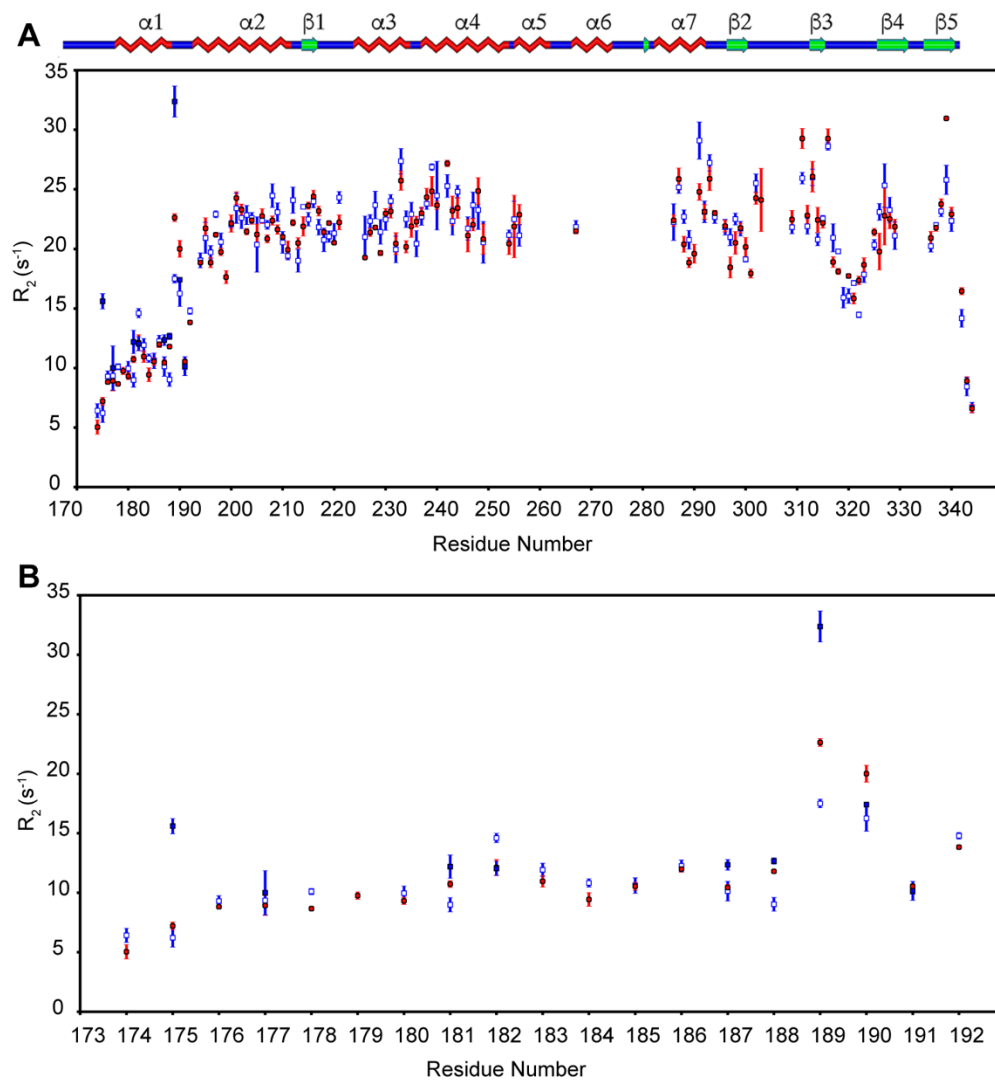

**Figure S3.**  $A$ ,  $^{15}\text{N}$  transverse relaxation rates ( $R_2$ ) measured on np-DUBA (red) and p-DUBA (blue), with the open squares denoting the **a** conformer or the only conformer present, and the closed squares denoting the **b** conformer.  $B$ , the expanded view of residues 174-192. Data were acquired at 700 MHz  $^1\text{H}$  frequency and 297.6 K.

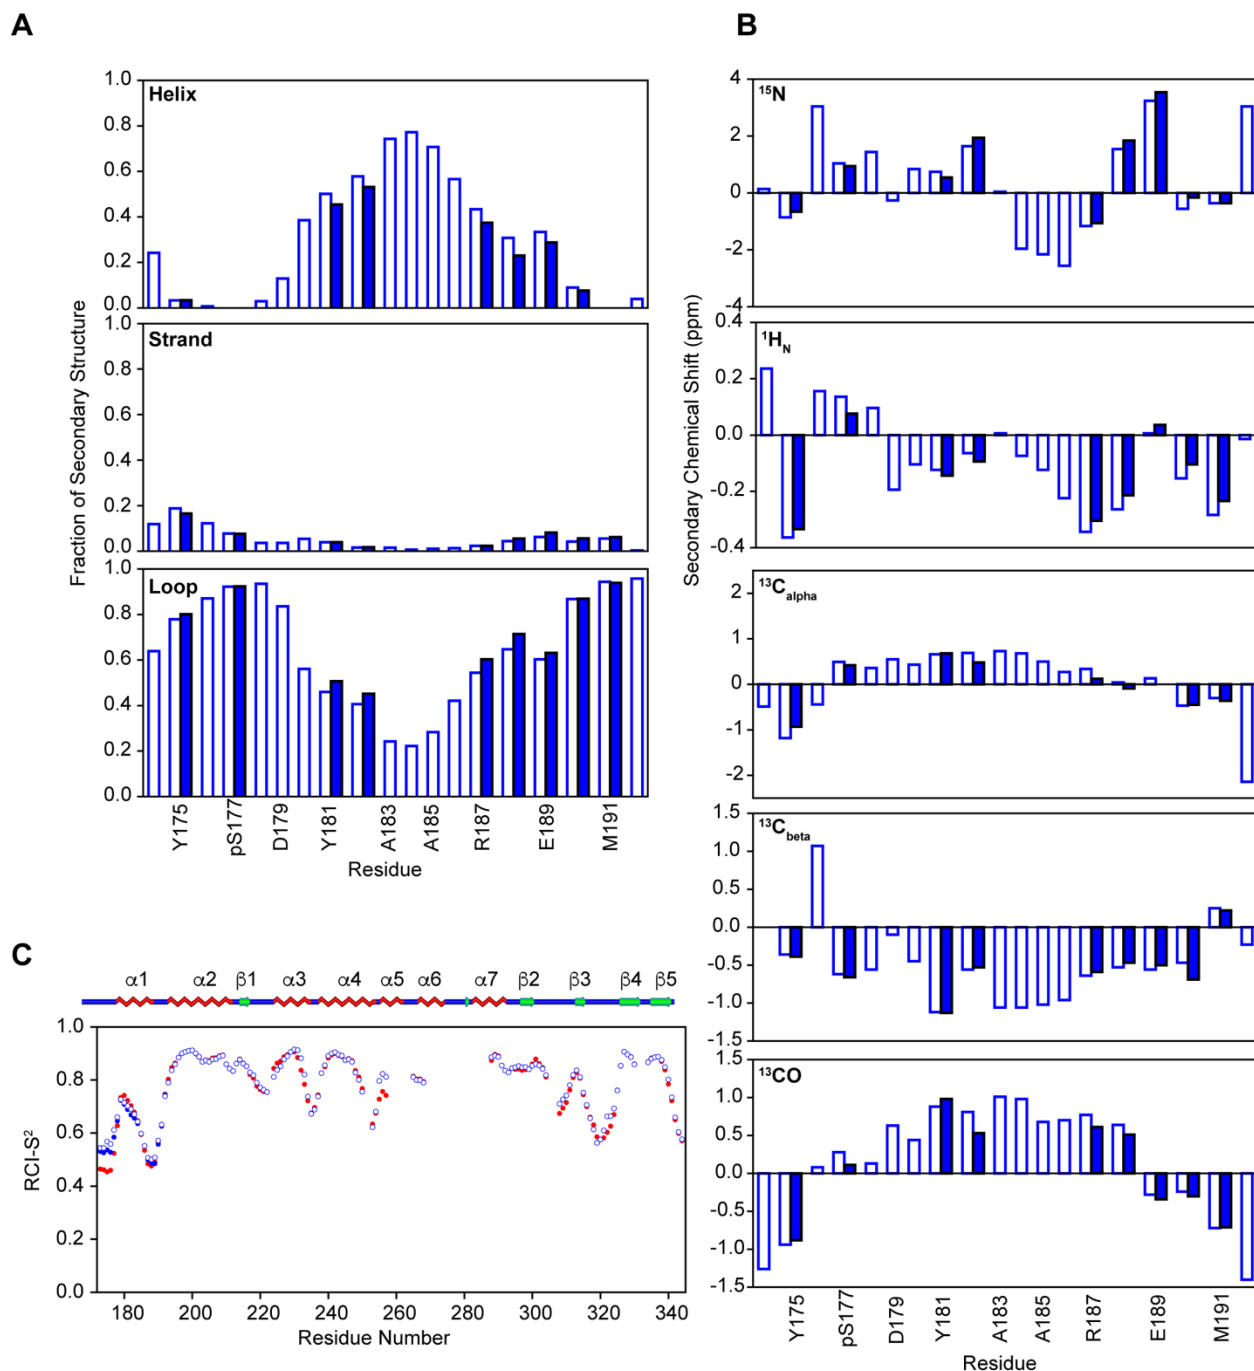

**Figure S4.** *A*, fractional secondary structures (helix, strand and loop) of residues 174-192 in p-DUBA predicted by TALOS-N (8). *B*, secondary chemical shifts of residues 174-192 in p-DUBA. Random coil shifts of all unmodified amino acids were from TALOS-N; for pSer, the random coil shifts were from the reference (9). The **a** conformer or the only conformer present is represented by open bars, and the **b** conformer by solid bars. *C*, backbone order parameters, RCI (random coil index)-S<sup>2</sup>, of np-DUBA (red) and p-DUBA (blue) predicted by TALOS-N (8,10). Open circles represent the **a** conformer or the only conformer present, and the closed circles represent the **b** conformer.  $^{13}\text{C}_\alpha$ ,  $^{13}\text{C}_\beta$ ,  $^{13}\text{CO}$ ,  $^{15}\text{N}$  and  $^1\text{H}_\text{N}$  chemical shifts were used to obtain predictions by TALOS-N.



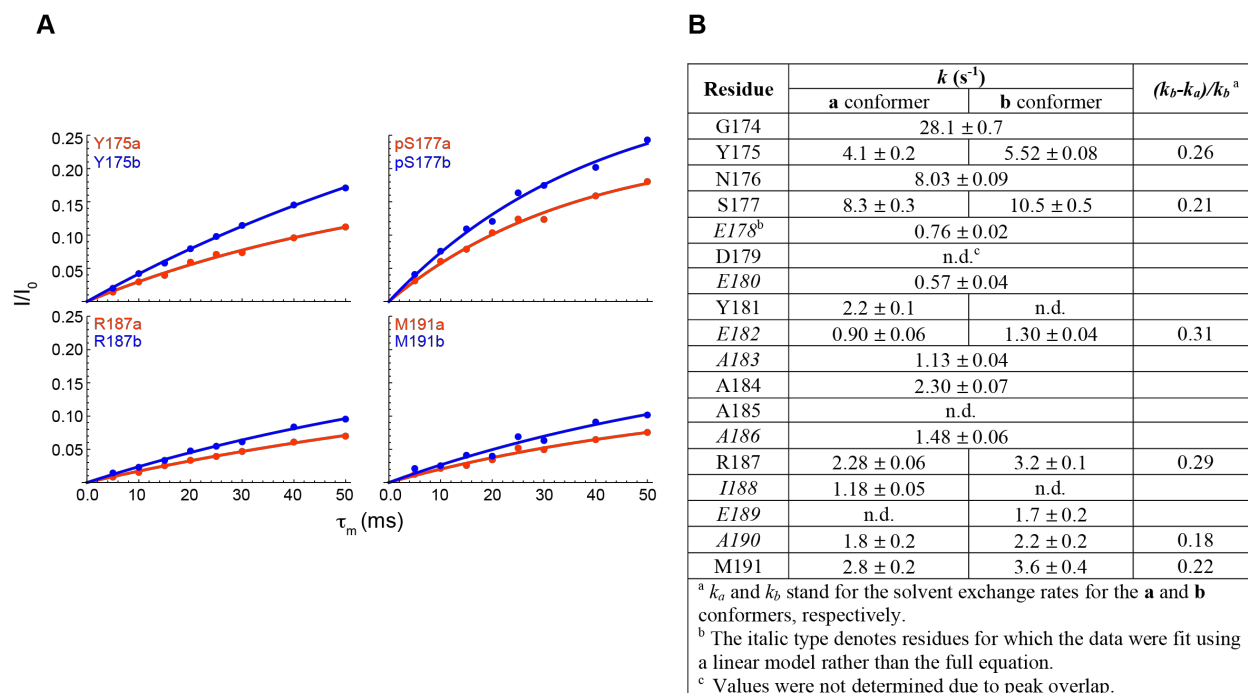

**Figure S5.** *A*, representative build-up curves during the solvent exchange period from the CLEANEX experiment. *B*, rates of solvent exchange ( $k$ ) for residues before helix  $\alpha 2$  in the tabular format.

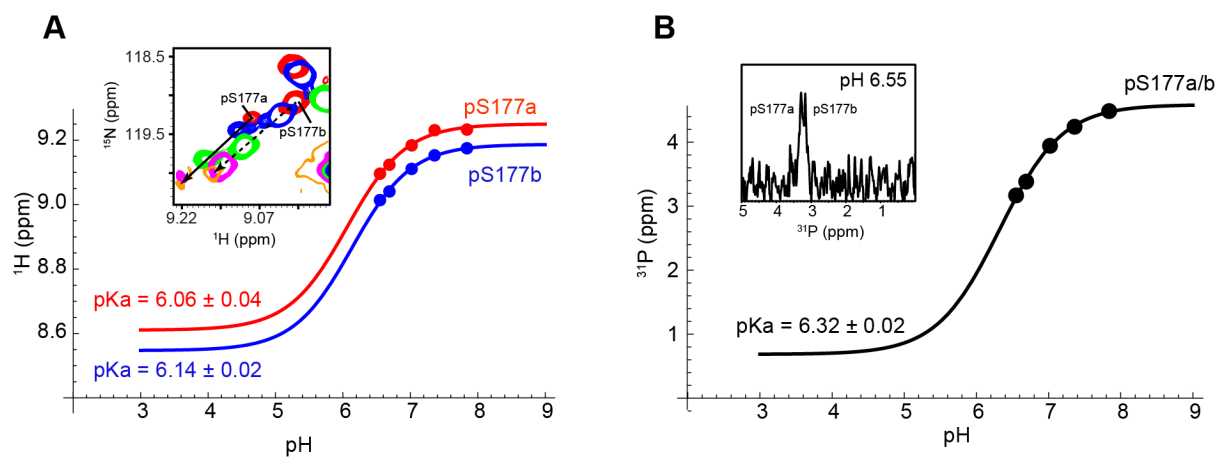

**Figure S6.** *A*, the pH titration curves of p-DUBA determined from the amide <sup>1</sup>H chemical shifts. The inset shows peak movement of pS177 as the pH value increases, as indicated by the arrows. The pH values are, 6.55 (red), 6.69 (blue), 7.02 (green), 7.36 (magenta) and 7.84 (orange). *B*, the pH titration curve of p-DUBA from the <sup>31</sup>P chemical shifts. For the 1D <sup>31</sup>P spectrum shown in the inset, an exponential apodization function corresponding to 5 Hz line broadening was applied to the time domain data before the Fourier transform. The **a** and **b** conformers are not well-resolved and were not analyzed separately. The titration curve was constructed from the averaged chemical shifts of the **a** and **b** conformers when they are partially resolved, or the chemical shift of the single peak observed.

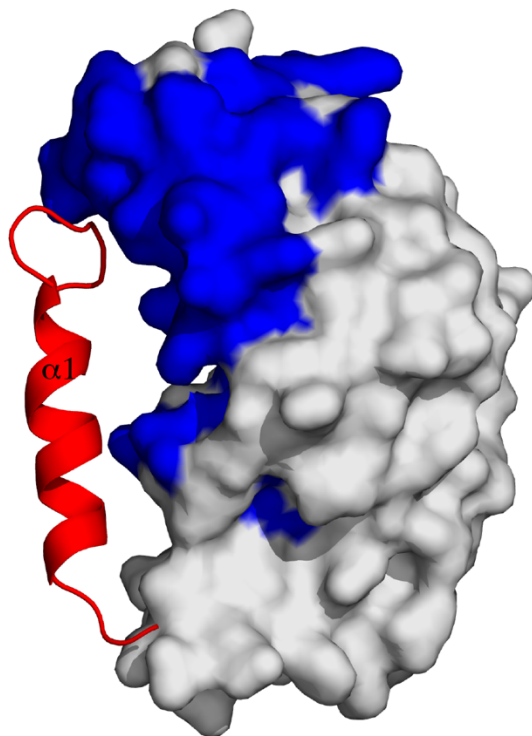

**Figure S7.** The p-DUBA crystal structure (PDB ID: 3TMP) with residues not visible in  $^{15}\text{N}$  TROSY spectra highlighted in blue. Helix  $\alpha 1$  and the  $\alpha 1$ - $\alpha 2$  loop (residues 172 – 193) are shown in cartoon representation and the remaining residues (194 – 340) in surface presentation.

**Table S1.** Secondary structure elements in crystal structures of the catalytic domain of DUBA

| PDB ID: 3TMP (bound) <sup>a</sup> |                | PDB ID: 3PFY (free) |                |
|-----------------------------------|----------------|---------------------|----------------|
| secondary structure               | residue number | secondary structure | residue number |
| $\alpha$ 1                        | 178-188        | $\alpha$ 1          | not visible    |
| $\alpha$ 2                        | 194-211        | $\alpha$ 2          | 194-211        |
| $\beta$ 1                         | 214-216        | $\beta$ 1           | 214-216        |
| $\alpha$ 3                        | 224-234        | $\alpha$ 3          | 224-234        |
| $\alpha$ 4                        | 237-253        | $\alpha$ 4          | 237-253        |
| $\alpha$ 5                        | 255-261        | $\alpha$ 5          | 255-258        |
| $\alpha$ 6                        | 266-273        | $\alpha$ 6          | not visible    |
| $\alpha$ 7                        | 282-291        | $\alpha$ 7          | 282-292        |
| $\beta$ 2                         | 296-299        | $\beta$ 2           | 296-299        |
| $\beta$ 3                         | 312-314        | $\beta$ 3           | 312-314        |
| $\beta$ 4                         | 325-330        | $\beta$ 4           | 325-330        |
| $\beta$ 5                         | 334-339        | $\beta$ 5           | 334-339        |

<sup>a</sup> In this structure, p-DUBA is conjugated to ubiquitin-aldehyde through the active site cysteine, C224.

**Table S2.**  $^1\text{H}$  and  $^{15}\text{N}$  chemical shifts of residues 174-192 in various forms of DUBA<sup>a</sup>

| residue | np-DUBA |                      | p-DUBA  |                      | np-R272E/K273E |                      | p-R272E/K273E |                      | S177E   |                      |
|---------|---------|----------------------|---------|----------------------|----------------|----------------------|---------------|----------------------|---------|----------------------|
|         | N (ppm) | H <sup>N</sup> (ppm) | N (ppm) | H <sup>N</sup> (ppm) | N (ppm)        | H <sup>N</sup> (ppm) | N (ppm)       | H <sup>N</sup> (ppm) | N (ppm) | H <sup>N</sup> (ppm) |
| G174    | 109.0   | 8.35                 | 109.6   | 8.46                 | 109.1          | 8.36                 | 109.5         | 8.45                 | 109.2   | 8.41                 |
| Y175a   | 120.6   | 7.97                 | 120.1   | 7.85                 | 120.7          | 7.99                 | 120.3         | 7.87                 | 120.5   | 7.96                 |
| Y175b   |         |                      | 120.3   | 7.88                 |                |                      |               |                      |         |                      |
| N176    | 121.9   | 8.45                 | 122.4   | 8.47                 | 122.1          | 8.41                 | 122.3         | 8.45                 | 122.1   | 8.43                 |
| S177a   | 117.1   | 8.20                 | 120.5   | 9.14                 | 117.2          | 8.20                 | 120.3         | 9.07                 | -       | -                    |
| S177b   |         |                      | 120.4   | 9.08                 |                |                      |               |                      |         |                      |
| E178    | 122.8   | 8.50                 | 122.3   | 8.39                 | 122.8          | 8.49                 | 122.2         | 8.39                 | 122.3   | 8.40                 |
| D179    | 120.7   | 8.14                 | 120.8   | 8.11                 | 120.8          | 8.13                 | 120.8         | 8.12                 | 121.6   | 8.15                 |
| E180    | 121.6   | 8.15                 | 121.7   | 8.19                 | 122.0          | 8.18                 | 121.9         | 8.18                 | 121.6   | 8.15                 |
| Y181a   | 121.5   | 8.03                 | 121.7   | 8.09                 | 121.5          | 8.03                 | 121.4         | 8.06                 | 121.6   | 8.09                 |
| Y181b   |         |                      | 121.5   | 8.07                 |                |                      |               |                      |         |                      |
| E182a   | 122.6   | 8.19                 | 122.5   | 8.23                 | 122.8          | 8.18                 | 122.8         | 8.19                 | 122.7   | 8.21                 |
| E182b   |         |                      | 122.8   | 8.20                 |                |                      |               |                      |         |                      |
| A183    | 124.5   | 8.07                 | 124.5   | 8.09                 | 124.7          | 8.07                 | 124.7         | 8.09                 | 124.7   | 8.10                 |
| A184    | 122.5   | 7.97                 | 122.5   | 8.01                 | 122.6          | 7.98                 | 122.5         | 8.01                 | 122.6   | 8.00                 |
| A185    | 122.3   | 7.94                 | 122.3   | 7.96                 | 122.5          | 7.93                 | 122.4         | 7.96                 | 122.4   | 7.95                 |
| A186    | 122.0   | 7.87                 | 121.9   | 7.86                 | 122.1          | 7.88                 | 122.1         | 7.87                 | 122.0   | 7.87                 |
| R187a   | 120.0   | 7.88                 | 120.0   | 7.86                 | 120.2          | 7.90                 | 120.1         | 7.90                 | 120.1   | 7.88                 |
| R187b   |         |                      | 120.1   | 7.90                 |                |                      |               |                      |         |                      |
| I188a   | 122.3   | 7.90                 | 122.1   | 7.88                 | 122.4          | 7.95                 | 122.3         | 7.93                 | 122.2   | 7.90                 |
| I188b   |         |                      | 122.4   | 7.93                 |                |                      |               |                      |         |                      |
| E189a   | 124.2   | 8.31                 | 124.1   | 8.30                 | 124.5          | 8.34                 | 124.4         | 8.34                 | 124.3   | 8.32                 |
| E189b   |         |                      | 124.4   | 8.33                 |                |                      |               |                      |         |                      |
| A190a   | 124.0   | 7.94                 | 123.9   | 7.93                 | 124.3          | 7.99                 | 124.3         | 7.99                 | 124.1   | 7.94                 |
| A190b   |         |                      | 124.3   | 7.98                 |                |                      |               |                      |         |                      |
| M191a   | 119.9   | 7.95                 | 119.9   | 7.94                 | 119.9          | 7.99                 | 119.8         | 8.00                 | 119.9   | 7.95                 |
| M191b   |         |                      | 119.9   | 7.99                 |                |                      |               |                      |         |                      |
| D192    | 124.0   | 8.28                 | 124.1   | 8.29                 | 124.1          | 8.26                 | 124.0         | 8.26                 | 124.1   | 8.29                 |

<sup>a</sup> Chemical shifts were measured at 300 K. For both  $^1\text{H}$  and  $^{15}\text{N}$  nuclei, the chemical shifts of the TROSY components are reported. The chemical shifts corresponding to the **b** conformer in p-DUBA and the only conformer in p-R272E/K273E are highlighted in red for easy comparison.

**Table S3.** The relative volumes of cross-peaks from the **a** conformer in p-DUBA<sup>a</sup>

| residue | relative peak volume (%)<br>(Sample 1) | relative peak volume (%)<br>(Sample 2) |
|---------|----------------------------------------|----------------------------------------|
| S177a   | 50                                     | 49                                     |
| E182a   | 56                                     | 58                                     |
| R187a   | 58                                     | 59                                     |
| I188a   | 65                                     | 65                                     |
| E189a   | 69                                     | 73                                     |
| A190a   | 63                                     | 64                                     |
| M191a   | 63                                     | 63                                     |

<sup>a</sup>The volumes of cross-peaks corresponding to the **a** and **b** conformers were determined from two <sup>15</sup>N TROSY spectra recorded on two independently prepared samples to ensure reproducibility. The relative peak volume of the **a** conformer is represented as a percentage of the sum of the two conformers. Y175 and Y181 display two conformers but were excluded from the analysis because the cross-peaks partially overlap with other residues.

**Table S4.** C $\alpha$ , C $\beta$  and C' chemical shifts of residues 173-193 in p-DUBA<sup>a</sup>

| residue | C $\alpha$ (ppm) | C $\beta$ (ppm) | C' (ppm) |
|---------|------------------|-----------------|----------|
| A173    | 52.19            | 18.21           | 177.88   |
| G174    | 44.61            | -               | 173.64   |
| Y175a   | 56.92            | 38.44           | 174.96   |
| Y175b   | 57.17            | 38.41           | 175.02   |
| N176    | 52.36            | 38.97           | 175.28   |
| S177a   | 58.89            | 65.08           | 175.18   |
| S177b   | 58.82            | 65.04           | 175.01   |
| E178    | 56.76            | 29.14           | 176.73   |
| D179    | 54.55            | 40.70           | 176.93   |
| E180    | 56.83            | 29.25           | 177.04   |
| Y181a   | 58.76            | 37.68           | 176.78   |
| Y181b   | 58.78            | 37.67           | 176.88   |
| E182a   | 57.09            | 29.14           | 177.41   |
| E182b   | 56.88            | 29.17           | 177.13   |
| A183    | 53.03            | 17.94           | 178.81   |
| A184    | 52.98            | 17.94           | 178.78   |
| A185    | 52.80            | 17.98           | 178.48   |
| A186    | 52.57            | 18.04           | 178.50   |
| R187a   | 56.44            | 29.66           | 177.07   |
| R187b   | 56.22            | 29.71           | 176.91   |
| I188a   | 61.34            | 37.47           | 177.04   |
| I188b   | 61.21            | 37.53           | 176.91   |
| E189a   | 56.53            | 29.14           | 176.32   |
| E189b   | 56.40            | 29.20           | 176.26   |
| A190a   | 51.83            | 18.53           | 177.56   |
| A190b   | 51.85            | 18.31           | 177.50   |
| M191a   | 55.00            | 32.85           | 175.58   |
| M191b   | 54.94            | 32.82           | 175.59   |
| D192    | 51.86            | 40.57           | 174.90   |
| P193    | 64.38            | 31.26           | 178.28   |

<sup>a</sup> Chemical shifts were measured at 296 K and 700 MHz <sup>1</sup>H frequency. Correction for deuterium isotope shift was not applied.

**Table S5.**  $^1\text{H}$  and  $^{15}\text{N}$  line widths of cross-peaks from residues 174-192 of p-DUBA in an  $^{15}\text{N}$  TROSY recorded at 299.6 K<sup>a</sup>

| Residue <sup>b</sup> | $^1\text{H}$ line width <sup>c</sup> (Hz) |                    | $^{15}\text{N}$ line width <sup>d</sup> (Hz) |                    |
|----------------------|-------------------------------------------|--------------------|----------------------------------------------|--------------------|
|                      | <b>a</b> conformer                        | <b>b</b> conformer | <b>a</b> conformer                           | <b>b</b> conformer |
| G174                 | 24                                        |                    | 20                                           |                    |
| N176                 | 23                                        |                    | 15                                           |                    |
| S177                 | 26                                        | 21                 | 19                                           | 19                 |
| E178                 | 13                                        |                    | 10                                           |                    |
| E180                 | 13                                        |                    | 10                                           |                    |
| E182                 | 15                                        | 14                 | 11                                           | 14                 |
| A183                 | 14                                        |                    | 11                                           |                    |
| A184                 | 12                                        |                    | 11                                           |                    |
| A185                 | 14                                        |                    | 17                                           |                    |
| A186                 | 15                                        |                    | 14                                           |                    |
| R187                 | 13                                        | 16                 | 10                                           | 11                 |
| I188                 | 17                                        | 17                 | 12                                           | 11                 |
| E189                 | 13                                        | 12                 | 11                                           | 12                 |
| A190                 | 15                                        | 19                 | 13                                           | 13                 |
| M191                 | 17                                        | 21                 | 13                                           | 14                 |
| D192                 | 14                                        |                    | 11                                           |                    |

<sup>a</sup> Line widths that are significantly different between the **a** and **b** conformers are highlighted in red.

<sup>b</sup> Only residues yielding well-resolved cross-peaks are shown in the table.

<sup>c</sup> The digital resolution is 11.3 Hz for the  $^1\text{H}$  dimension.

<sup>d</sup> The digital resolution is 10.6 Hz for the  $^{15}\text{N}$  dimension.



## References:

1. Hwang, T. L., van Zijl, P. C., and Mori, S. (1998) Accurate quantitation of water-amide proton exchange rates using the phase-modulated CLEAN chemical EXchange (CLEANEX-PM) approach with a Fast-HSQC (FHSQC) detection scheme. *J. Biomol. NMR* **11**, 221-226
2. Zhu, G., Xia, Y., Nicholson, L. K., and Sze, K. H. (2000) Protein dynamics measurements by TROSY-based NMR experiments. *J. Magn. Reson.* **143**, 423-426
3. Baryshnikova, O. K., Williams, T. C., and Sykes, B. D. (2008) Internal pH indicators for biomolecular NMR. *J. Biomol. NMR* **41**, 5-7
4. Maurer, T., and Kalbitzer, H. R. (1996) Indirect Referencing of <sup>31</sup>P and <sup>19</sup>F NMR Spectra. *J. Magn. Reson. B* **113**, 177-178
5. Croke, R. L., Patil, S. M., Quevreaux, J., Kendall, D. A., and Alexandrescu, A. T. (2011) NMR determination of pKa values in alpha-synuclein. *Protein Sci.* **20**, 256-269
6. Platzer, G., Okon, M., and McIntosh, L. P. (2014) pH-dependent random coil (<sup>1</sup>H), (<sup>13</sup>C), and (<sup>15</sup>N) chemical shifts of the ionizable amino acids: a guide for protein pK<sub>a</sub> measurements. *J. Biomol. NMR* **60**, 109-129
7. Grzesiek, S., Stahl, S. J., Wingfield, P. T., and Bax, A. (1996) The CD4 determinant for downregulation by HIV-1 Nef directly binds to Nef. Mapping of the Nef binding surface by NMR. *Biochemistry* **35**, 10256-10261
8. Shen, Y., and Bax, A. (2013) Protein backbone and sidechain torsion angles predicted from NMR chemical shifts using artificial neural networks. *J. Biomol. NMR* **56**, 227-241
9. Hendus-Altenburger, R., Fernandes, C. B., Bugge, K., Kunze, M. B. A., Boomsma, W., and Kragelund, B. B. (2019) Random coil chemical shifts for serine, threonine and tyrosine phosphorylation over a broad pH range. *J. Biomol. NMR* **73**, 713-725
10. Berjanskii, M. V., and Wishart, D. S. (2005) A simple method to predict protein flexibility using secondary chemical shifts. *J. Am. Chem. Soc.* **127**, 14970-14971
